# Supplementary material for: From Screen to Field: The Impact of Digital Sports Participation on Leisure Time Satisfaction
Source: Research Square preprint supplement (doi:10.21203/rs.3.rs-7913596/v1), 2025-11-11
Supplement: Supplementary file 1 [file 5038fbe7a3cf8d5b9fbbc96b.pdf]

İZMİR DEMOCRACY UNIVERSITY FACULTY OF SOCIAL AND HUMANITIES  
SCIENTIFIC RESEARCH AND PUBLICATION ETHICS COMMITTEE APPROVAL FORM

Protocol No: 2022/66  
Date of Approval: 06/07/2022  
Decision Number and No: 2022/07-02  
Location: Izmir Democracy University  
Criteria: Helsinki Declaration

|                                                                                                                                          |                                                                                                                                                                                                                                         |
|------------------------------------------------------------------------------------------------------------------------------------------|-----------------------------------------------------------------------------------------------------------------------------------------------------------------------------------------------------------------------------------------|
| <b>Title of the Research:</b>                                                                                                            | “The Mediating Role of Self-Compassion in the Relationship Between Gender-Based Discrimination and Depression Levels Among University Sports Team Athletes”                                                                             |
| <b>Project _ Thesis _<br/>Article x Other__<br/>Type</b>                                                                                 | Project, Article                                                                                                                                                                                                                        |
| <b>Researchers</b>                                                                                                                       | 1 - Doç. Dr. Nurgül ÖZDEMİR<br>2- Tunahan Ay                                                                                                                                                                                            |
| <b>Project/Thesis/Article/<br/>Other<br/>Researcher Contact<br/>Information (Project<br/>Supervisor/Thesis Author/<br/>First Author)</b> | Assoc. Prof. Dr. Nurgül ÖZDEMİR<br>(Izmir Democracy University, Faculty of Health Sciences, Department of Sport Sciences, Division of Sport Sciences)<br>Tunahan Ay<br>(Izmir Democracy University, Faculty of Health Science, Student) |
| <b>Thesis Advisor(s)</b>                                                                                                                 | Doç. Dr. Nurgül ÖZDEMİR                                                                                                                                                                                                                 |
| <b>Decision</b>                                                                                                                          | ETHICALLY APPROVED ( X)<br>NEEDS ETHICAL REVISIONS ( )<br>ETHICALLY NOT APPROVED ( )                                                                                                                                                    |

Based on the letter of İzmir Democracy University Institute of Social Sciences dated 06/07/2022 and numbered 66, the thesis and article study titled “An Examination of the Role of Digital Sports in Determining Leisure Time Satisfaction” conducted by Tunahan Ay student at İzmir Democracy University Institute of Social Sciences, under the supervision of Assoc. Prof. Dr. Nurgül ÖZDEMİR from the Department of Sport Sciences, Faculty of Health Sciences, has been reviewed.



Prof. Dr. Sabahattin DENİZ

Chair, Scientific Research and Publication Ethics Committee  
Faculty of Social and Human Sciences
